# Supplementary material
Source: PubMed Central journal article supplement (PMC7346235)
Supplement: ao0c01581_si_001.pdf [file ao0c01581_si_001.pdf]

## Supplemental material

# In Silico ADME/Tox Profiling of natural products: a Focus on BIOFACQUIM

Noemi Angeles Durán-Iturbide, Bárbara I. Díaz-Eufracio\*, José L. Medina-Franco\*

*School of Chemistry, Department of Pharmacy, National Autonomous University of Mexico, Avenida Universidad 3000, 04510 Mexico City, Mexico*

\*Correspondence: dieb@comunidad.unam.mx (Díaz-Eufracio); medinajl@unam.com.mx (Medina-Franco);  
Tel.: +5255-5622-3899

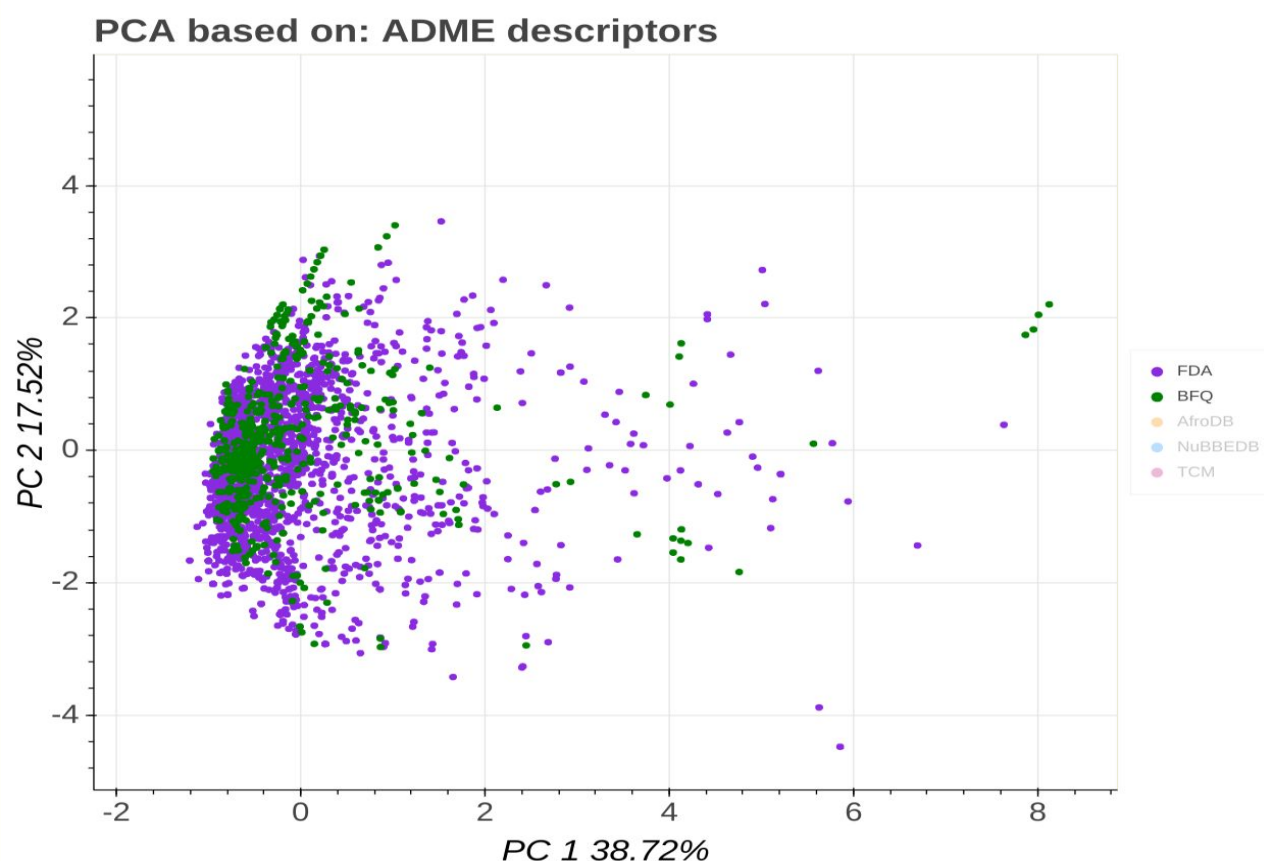

**Figure S1.** Chemical Space visualization of BIOFACQUIM and FDA datasets

**Table S1.** PCA summary.

|                                   | PC 1 | PC 2 |
|-----------------------------------|------|------|
| Percentage of variance            | 0.38 | 0.18 |
| Cumulative percentage of variance | 0.38 | 0.56 |

**Table S2.** PCA loadings.

|                          | PC 1  | PC 2  | PC 3  |
|--------------------------|-------|-------|-------|
| MW                       | 0.32  | 0.19  | -0.19 |
| #Rotatable Bonds         | 0.29  | 0.08  | 0.16  |
| #Acceptors               | 0.33  | -0.15 | 0.25  |
| #Donors                  | 0.33  | -0.19 | 0.22  |
| Surface Area             | 0.35  | 0.07  | 0.25  |
| Silicos-IT LogSw         | -0.01 | -0.46 | -0.34 |
| Consensus Log P          | -0.07 | 0.48  | 0.23  |
| Intestinal absorption    | -0.27 | 0.28  | -0.04 |
| BBB permeability         | -0.33 | 0.17  | -0.20 |
| Fraction unbound         | 0.02  | -0.39 | -0.17 |
| Total Clearance          | -0.13 | 0.05  | -0.19 |
| Fraction Csp3            | 0.09  | 0.07  | -0.36 |
| #Heavy atoms             | 0.32  | 0.21  | -0.18 |
| Lipinski #violations     | 0.26  | 0.13  | -0.38 |
| Veber #violations        | 0.26  | 0.06  | -0.39 |
| Leadlikeness #violations | 0.15  | 0.35  | -0.16 |

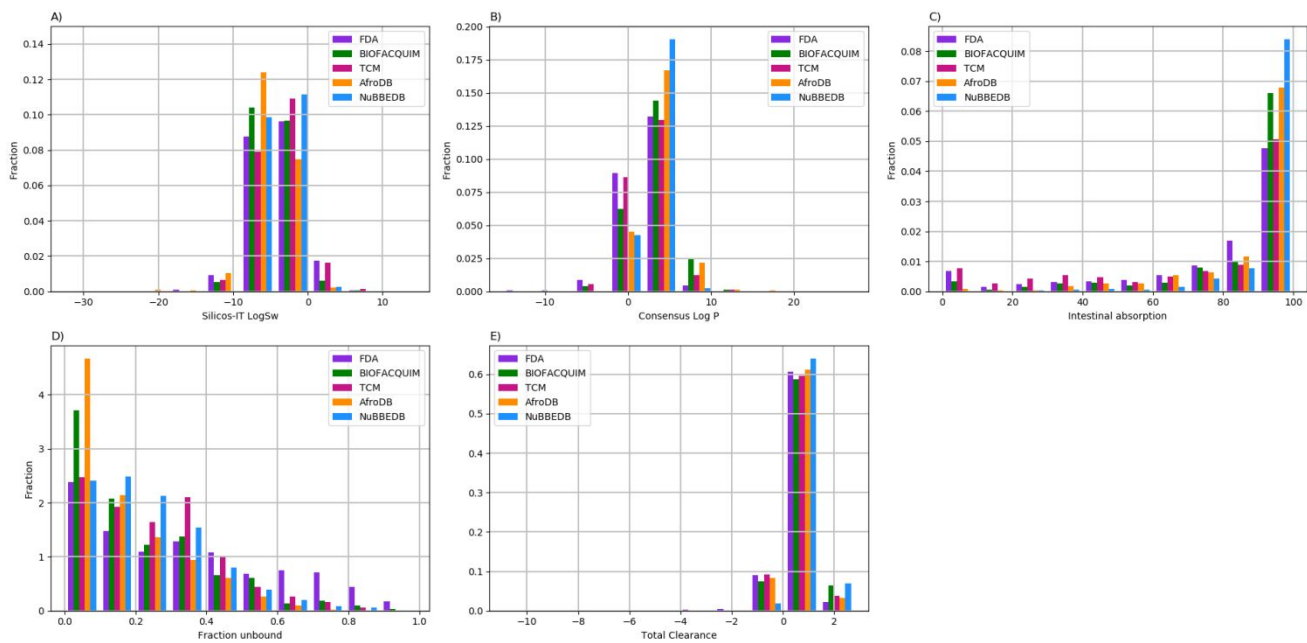

**Figure S2.** Histograms A)Silicos -IT LogSW, B)Consensus Log P, C)Intestinal absorption, D)Fraction unbound and E)Total clearance

**Table S3.** Statistical values of Silicos-IT LogSW predicted with SwissADME.

| Database            | mean   | std   | min    | 25%    | 50%    | 75%    | max   |
|---------------------|--------|-------|--------|--------|--------|--------|-------|
| AfroDB              | -5.171 | 2.643 | -20.61 | -6.478 | -5.03  | -3.618 | 4.02  |
| BIOFACQUIM          | -4.197 | 2.611 | -13.44 | -5.63  | -4.4   | -2.675 | 6.4   |
| FDA                 | -3.996 | 3.216 | -19.66 | -5.86  | -4.105 | -2.14  | 14.44 |
| NuBBE <sub>DB</sub> | -4.007 | 1.642 | -8.47  | -5.1   | -4.22  | -3.03  | 3.67  |
| TCM                 | -3.627 | 2.996 | -32.55 | -5.36  | -3.64  | -1.92  | 8.92  |

**Table S4.** Statistical values of Consensus LogP predicted with SwissADME.

| Library             | mean  | std   | min    | 25%   | 50%   | 75%   | max   |
|---------------------|-------|-------|--------|-------|-------|-------|-------|
| AfroDB              | 3.541 | 2.246 | -2.23  | 2.202 | 3.35  | 4.588 | 20.2  |
| BIOFACQUIM          | 2.993 | 2.329 | -6.41  | 1.745 | 2.76  | 3.93  | 12.1  |
| FDA                 | 1.949 | 2.412 | -15.01 | 0.638 | 2.275 | 3.51  | 11.9  |
| NuBBE <sub>DB</sub> | 2.916 | 1.334 | -3.38  | 2.16  | 2.8   | 3.72  | 7.9   |
| TCM                 | 2.45  | 2.531 | -6.87  | 1.02  | 2.45  | 3.72  | 27.31 |

**Table S5.** Statistical values of intestinal absorption in humans predicted with pkCSM-pharmacokinetics.

| Library    | mean   | std    | min   | 25%    | 50%    | 75%    | max |
|------------|--------|--------|-------|--------|--------|--------|-----|
| AfroDB     | 86.934 | 17.887 | 0     | 84.364 | 94.236 | 97.324 | 100 |
| BIOFACQUIM | 83.433 | 23.57  | 0     | 81.087 | 93.61  | 96.304 | 100 |
| FDA        | 75.458 | 28.327 | 0     | 66.876 | 89.224 | 93.864 | 100 |
| NuBBEDB    | 92.241 | 10.679 | 9.754 | 92.549 | 95.076 | 97.061 | 100 |
| TCM        | 72.288 | 31.79  | 0     | 49.364 | 90.5   | 95.879 | 100 |

**Table S6.** Percentage of common distribution endpoints prediction.

| variable         | FDA | BIOFACQUIM | AfroDB | NuBBE <sub>DB</sub> | TCM |
|------------------|-----|------------|--------|---------------------|-----|
| BBB permeability | 39  | 41         | 36     | 70                  | 30  |
| Pgp substrate    | 41  | 29         | 37     | 18                  | 47  |



**Table S7.** Statistical values of fraction unbound predicted with pkCSM-pharmacokinetics.

| Library             | mean  | std   | min | 25%   | 50%   | 75%   | max   |
|---------------------|-------|-------|-----|-------|-------|-------|-------|
| AfroDB              | 0.158 | 0.154 | 0   | 0.026 | 0.114 | 0.244 | 0.76  |
| BIOFACQUIM          | 0.213 | 0.201 | 0   | 0.047 | 0.148 | 0.332 | 0.969 |
| FDA                 | 0.339 | 0.261 | 0   | 0.106 | 0.307 | 0.53  | 0.987 |
| NuBBE <sub>DB</sub> | 0.233 | 0.167 | 0   | 0.104 | 0.208 | 0.333 | 0.989 |
| TCM                 | 0.253 | 0.186 | 0   | 0.1   | 0.237 | 0.379 | 0.933 |

**Table S8.** Percentage of CYP inhibition by dataset.

|         | Percentage CYPs inhibition |            |        |                     |     |
|---------|----------------------------|------------|--------|---------------------|-----|
|         | FDA                        | BIOFACQUIM | AfroDB | NuBBE <sub>DB</sub> | TCM |
| CYP1A2  | 21                         | 30         | 27     | 47                  | 19  |
| CYP2C19 | 18                         | 22         | 26     | 33                  | 14  |
| CYP2C9  | 20                         | 31         | 38     | 37                  | 20  |
| CYP2D6  | 30                         | 22         | 31     | 36                  | 18  |
| CYP3A4  | 24                         | 30         | 41     | 31                  | 23  |

**Table S9.** Statistical metrics of Total Clearance predicted with pkCSM-pharmacokinetics.

| Library             | mean  | std   | min     | 25%   | 50%   | 75%   | max   |
|---------------------|-------|-------|---------|-------|-------|-------|-------|
| AfroDB              | 0.5   | 0.477 | -2.689  | 0.196 | 0.458 | 0.73  | 2.547 |
| BIOFACQUIM          | 0.605 | 0.521 | -2.458  | 0.238 | 0.565 | 0.861 | 2.078 |
| FDA                 | 0.505 | 0.689 | -10.922 | 0.255 | 0.573 | 0.852 | 2.796 |
| NuBBE <sub>DB</sub> | 0.705 | 0.465 | -0.171  | 0.328 | 0.643 | 0.973 | 2.242 |
| TCM                 | 0.547 | 0.533 | -5.197  | 0.221 | 0.519 | 0.823 | 2.56  |

**Table S10.** Percentage of common toxicity endpoints prediction.

| variable          | FDA | BIOFACQUIM | AfroDB | NuBBE <sub>DB</sub> | TCM |
|-------------------|-----|------------|--------|---------------------|-----|
| hERG I inhibitor  | 2   | 0          | 0      | 0                   | 0   |
| hERG II inhibitor | 31  | 28         | 45     | 21                  | 37  |
| AMES toxicity     | 16  | 19         | 22     | 25                  | 17  |
| Hepatotoxicity    | 74  | 15         | 20     | 15                  | 15  |
